# Supplementary material for: Formation mechanism of Fe2O3 hollow fibers by direct annealing of the electrospun composite fibers and their magnetic, electrochemical properties
Source: Royal Society of Chemistry journal article supplement (doi:10.1039/c0ce00379d), 2011-01-01
Supplement: c0ce00379d.pdf [file c0ce00379d.pdf]

## Supporting Information

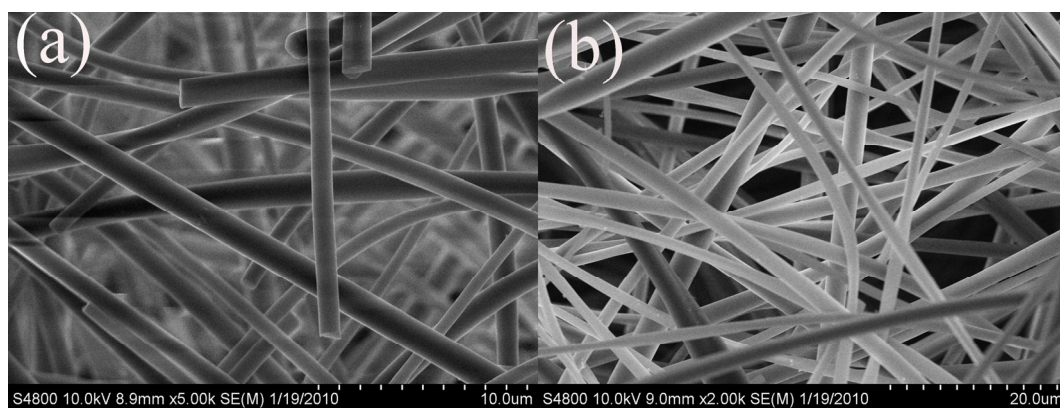

Fig. S1 SEM images of electrospun composite fibers with different addition PVP used 7.5 ml water and 2.5 ml ethanol as solvent (a) 6.00 g; (b) 6.50 g.
